# Supplementary material for: Loss of thyroid hormone receptor interactor 13 inhibits cell proliferation and survival in human chronic lymphocytic leukemia
Source: PubMed Central journal article supplement (PMC5421944; doi:10.18632/oncotarget.16038), 2017-03-09
Supplement: oncotarget-08-25469-s001.pdf [file oncotarget-08-25469-s001.pdf]

# Loss of thyroid hormone receptor interactor 13 inhibits cell proliferation and survival in human chronic lymphocytic leukemia

## SUPPLEMENTARY MATERIALS

## SUPPLEMENTARY FIGURES

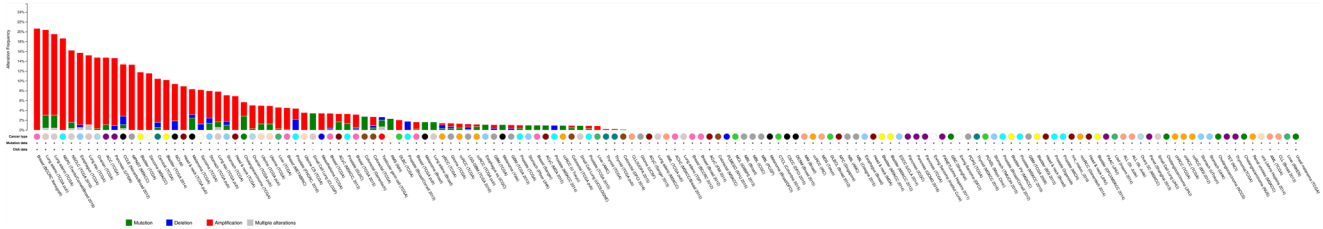

Supplementary Figure 1: Meta-analysis of TRIP13 mutation, DNA copy number and gene expression in multiple cancers using TCGA (<http://www.cbioportal.org/>).

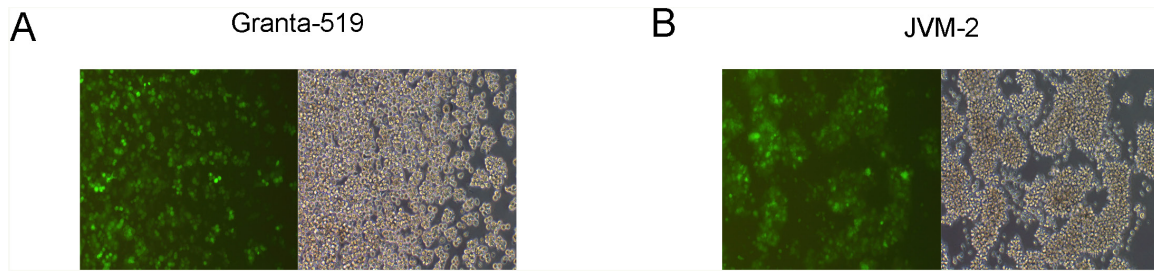

**Supplementary Figure 2: Bright and fluorescence field of Granta-519 and JVM-2 cells after infection with lentivirus containing TRIP13 at magnification of  $\times 100$ .**

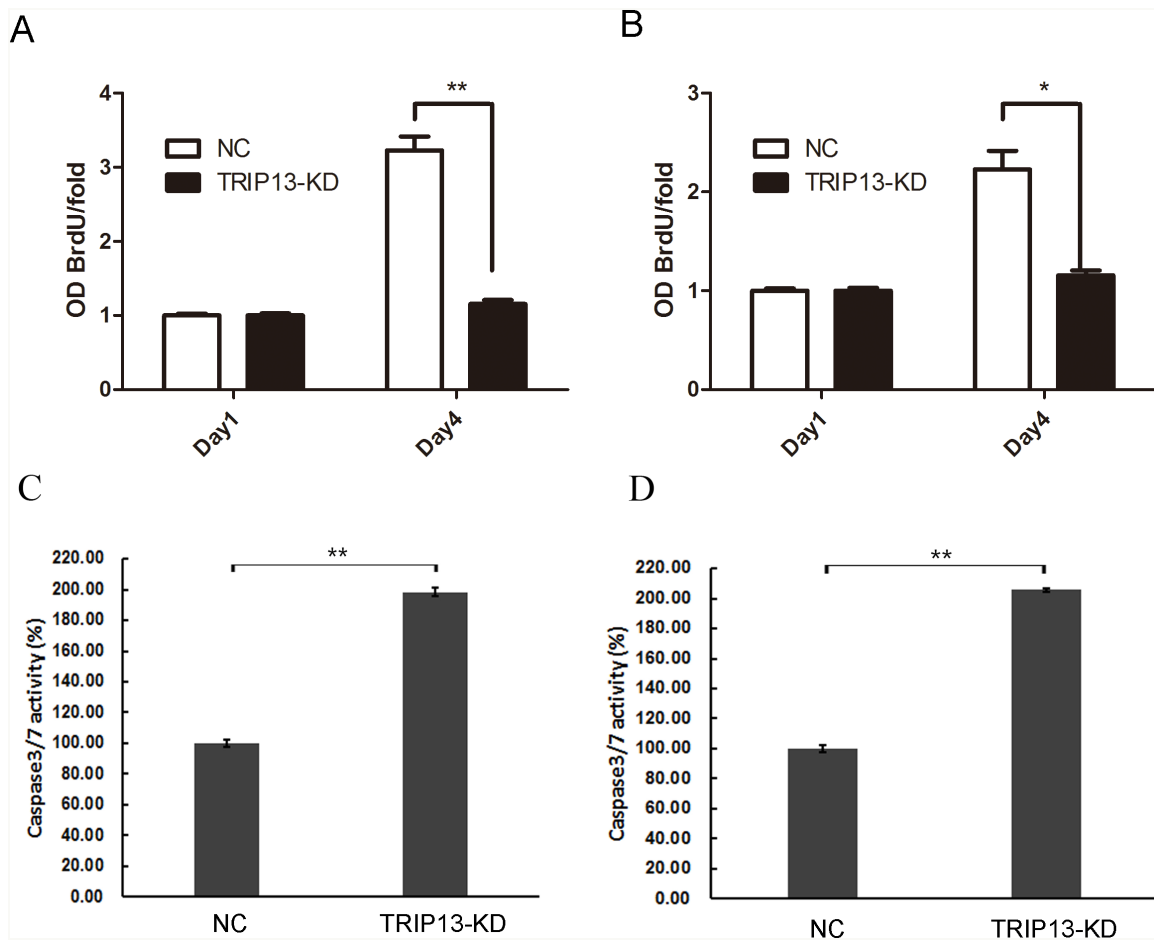

**Supplementary Figure 3: BrdU assay showed the cell proliferation state in (A) Granta-519 and (B) JVM-2 cells after infection with lentivirus containing TRIP13 were detected. (\* $p < 0.05$ , \*\* $p < 0.01$ , ttest). Caspase 3/7 activities in (C) Granta-519 and (D) JVM-2 cells after infection with lentivirus containing TRIP13 were detected. (\*\* $p < 0.01$ , ttest).**

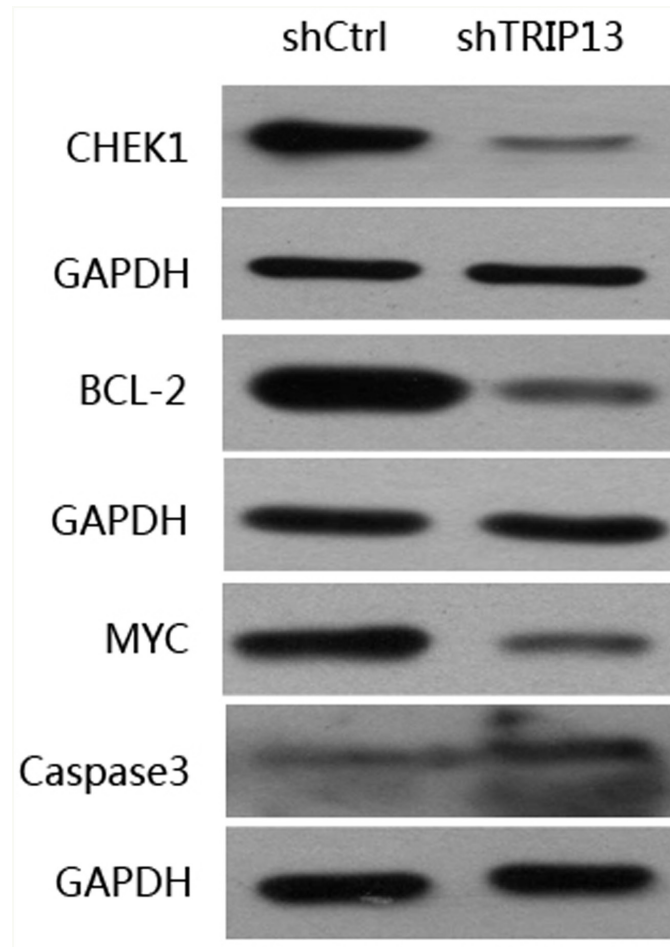

Supplementary Figure 4: Protein level of CHEK1, BCL-2, c-MYC and Caspase3 in NC and TRIP13 knockdown JMV-2 cells detected by western bolt.

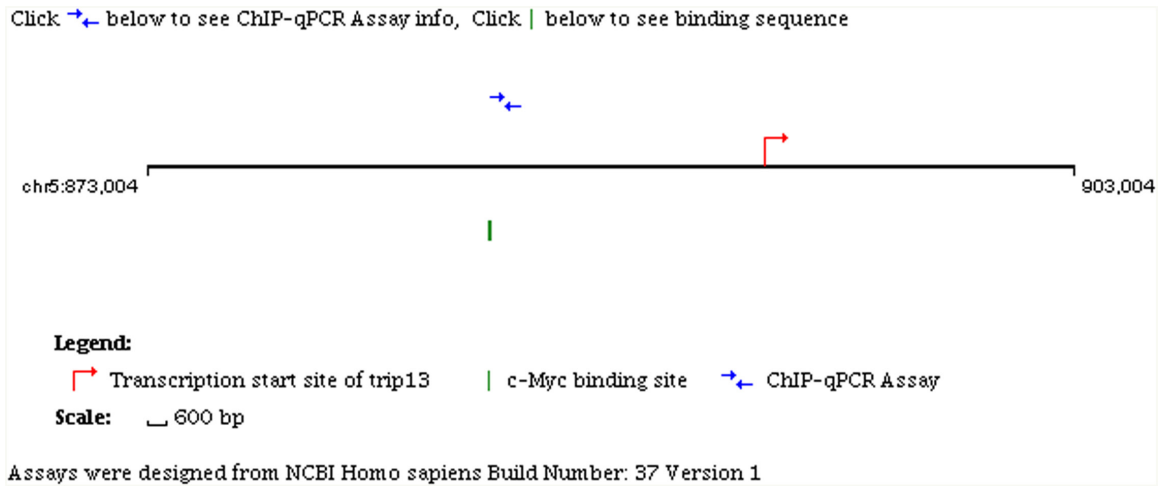

Supplementary Figure 5: Prediction of c-MYC binding sites upstream TRIP13 5UTR using The Champion ChIP Transcription Factor Search Portal.
